# Supplementary material
Source: PubMed Central journal article supplement (PMC4721899)

**Figure S1.** Sensitivity, specificity, positive and negative predictive values of a Medicare claims-based algorithm (CKD<sub>Medicare</sub>) for identifying chronic kidney disease defined as estimated glomerular filtration rate (eGFR) < 45 ml/min/1.73 m<sup>2</sup> or albumin-to-creatinine ratio > 300 mg/g measured in a research study (CKD<sub>REGARDS</sub>) serving as the gold standard

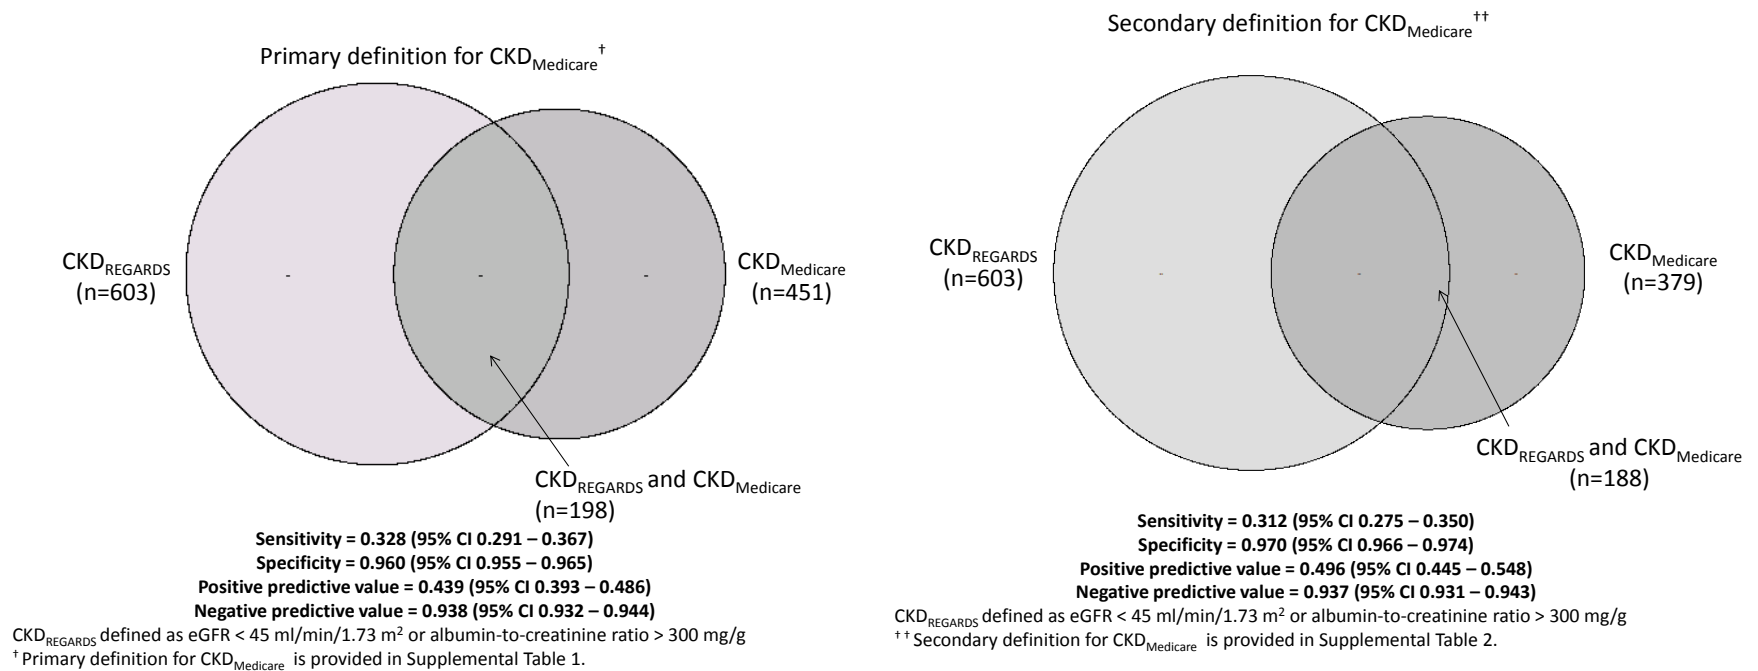

Supplement: NIHMS629831-supplement-1.pdf [file NIHMS629831-supplement-1.pdf]
