# Supplementary material
Source: PubMed Central journal article supplement (PMC4721899)
Supplement: NIHMS629831-supplement-3.pdf [file NIHMS629831-supplement-3.pdf]

**Item S2.** Inpatient and outpatient ICD-9 codes in claims used to define chronic kidney disease in Medicare data (CKD<sub>Medicare</sub>) in our secondary analyses.

250.4 - Diabetes with renal manifestations  
403.x1 - Hypertensive chronic kidney disease  
403.x0 (after October 1, 2006) - Hypertensive chronic kidney disease (subtypes)  
404.x2, Hypertensive heart and chronic kidney disease  
404.x3, Hypertensive heart and chronic kidney disease (subtypes)  
404.x0 Hypertensive heart and chronic kidney disease (subtypes)  
404.x1 Benign hypertension and renal disease (after October 1, 2006)  
582.xx Chronic glomerulonephritis  
585.1 Chronic kidney disease, Stage I  
585.2 Chronic kidney disease, Stage II (mild)  
585.3 Chronic kidney disease, Stage III (moderate)  
585.4 Chronic kidney disease, Stage IV (severe)  
585.5 Chronic kidney disease, Stage V  
585.6 End stage renal disease  
585.9 Chronic kidney disease, unspecified  
586 Renal failure, unspecified  
791.0 Proteinuria

Chronic kidney disease in Medicare was defined as the presence of any of the above ICD-9 codes associated with an inpatient, skilled nursing facility or home health aide claim or an outpatient claim linked to a physician evaluation and management claim.
