# Supplementary material
Source: PubMed Central journal article supplement (PMC4721899)
Supplement: NIHMS629831-supplement-4.pdf [file NIHMS629831-supplement-4.pdf]

Table S1. Sensitivity, specificity and positive and negative predictive values of a claims-based algorithm for identifying progressively lower levels of estimated glomerular filtration rate and higher albumin-to-creatinine ratios using the primary definition of CKD in Medicare (see Item S1).

| <b>REGARDS</b>                             | <b>Number with CKD</b>       |                               | <b>Sensitivity</b>   | <b>Specificity</b>   | <b>PPV</b>           | <b>NPV</b>           |
|--------------------------------------------|------------------------------|-------------------------------|----------------------|----------------------|----------------------|----------------------|
| <b>Definition of CKD<sub>REGARDS</sub></b> | <b>CKD<sub>REGARDS</sub></b> | <b>CKD<sub>Medicare</sub></b> |                      |                      |                      |                      |
| eGFR < 60 ml/min/1.73 m <sup>2</sup>       | 1396                         | 451                           | 0.206 (0.185, 0.228) | 0.971 (0.966, 0.975) | 0.639 (0.592, 0.683) | 0.830 (0.821, 0.839) |
| eGFR < 45 ml/min/1.73 m <sup>2</sup>       | 475                          | 451                           | 0.371 (0.327, 0.416) | 0.958 (0.953, 0.962) | 0.390 (0.345, 0.437) | 0.954 (0.949, 0.959) |
| eGFR < 30 ml/min/1.73 m <sup>2</sup>       | 94                           | 451                           | 0.564 (0.458, 0.666) | 0.942 (0.936, 0.948) | 0.118 (0.089, 0.151) | 0.994 (0.991, 0.995) |
| ACR > 30 mg/g                              | 1270                         | 451                           | 0.169 (0.148, 0.190) | 0.959 (0.953, 0.964) | 0.475 (0.428, 0.522) | 0.838 (0.829, 0.847) |
| ACR > 300 mg/g                             | 205                          | 451                           | 0.302 (0.240, 0.370) | 0.943 (0.937, 0.948) | 0.137 (0.107, 0.173) | 0.978 (0.974, 0.982) |

CKD – chronic kidney disease, eGFR – estimated glomerular filtration rate, ACR – albumin-to-creatinine ratio, PPV – positive predictive value, NPV – negative predictive value.
