# Supplementary material
Source: PubMed Central journal article supplement (PMC4721899)
Supplement: NIHMS629831-supplement-5.pdf [file NIHMS629831-supplement-5.pdf]

Table S2. Sensitivity, specificity and positive and negative predictive values of a claims-based algorithm for identifying progressively lower levels of estimated glomerular filtration rate and higher albumin-to-creatinine ratios using the secondary definition of CKD in Medicare (see Item S2).

| REGARDS                                    | Number with CKD        |                         | Sensitivity          | Specificity          | PPV                  | NPV                  |
|--------------------------------------------|------------------------|-------------------------|----------------------|----------------------|----------------------|----------------------|
|                                            | CKD <sub>REGARDS</sub> | CKD <sub>Medicare</sub> |                      |                      |                      |                      |
| <b>Definition of CKD<sub>REGARDS</sub></b> | CKD <sub>REGARDS</sub> | CKD <sub>Medicare</sub> |                      |                      |                      |                      |
| eGFR < 60 ml/min/1.73 m <sup>2</sup>       | 1396                   | 379                     | 0.183 (0.163, 0.204) | 0.978 (0.974, 0.982) | 0.673 (0.623, 0.720) | 0.827 (0.818, 0.836) |
| eGFR < 45 ml/min/1.73 m <sup>2</sup>       | 475                    | 379                     | 0.356 (0.313, 0.401) | 0.968 (0.963, 0.972) | 0.446 (0.395, 0.498) | 0.954 (0.948, 0.959) |
| eGFR < 30 ml/min/1.73 m <sup>2</sup>       | 94                     | 379                     | 0.564 (0.458, 0.666) | 0.953 (0.947, 0.958) | 0.140 (0.107, 0.179) | 0.994 (0.992, 0.996) |
| ACR > 30 mg/g                              | 1270                   | 379                     | 0.152 (0.133, 0.173) | 0.967 (0.963, 0.972) | 0.509 (0.458, 0.561) | 0.837 (0.828, 0.846) |
| ACR > 300 mg/g                             | 205                    | 379                     | 0.293 (0.231, 0.360) | 0.953 (0.948, 0.958) | 0.158 (0.123, 0.199) | 0.978 (0.974, 0.981) |

CKD – chronic kidney disease, eGFR – estimated glomerular filtration rate, ACR – albumin-to-creatinine ratio, PPV – positive predictive value, NPV – negative predictive value.
