# Supplementary material
Source: PubMed Central journal article supplement (PMC4721899)
Supplement: NIHMS629831-supplement-6.pdf [file NIHMS629831-supplement-6.pdf]

**Table S3.** Number and percentage of REGARDS participants with Medicare claims for chronic kidney disease (CKD<sub>Medicare</sub>) among REGARDS study participants with chronic kidney disease at their study visit (CKD<sub>REGARDS</sub>).

|                                                      | No CKD <sub>Medicare</sub><br>(n=1862) | CKD <sub>Medicare</sub><br>(n=341) | p-value |
|------------------------------------------------------|----------------------------------------|------------------------------------|---------|
| <b>REGARDS variables<br/>(collected at baseline)</b> |                                        |                                    |         |
| Age, years                                           | N (%)                                  | N (%)                              |         |
| < 75                                                 | 865 (83.9)                             | 166 (16.1)                         | 0.55    |
| 75 – 84                                              | 855 (85.4)                             | 146 (14.6)                         |         |
| ≥ 85                                                 | 142 (83.0)                             | 29 (17.0)                          |         |
| White                                                | 1259 (85.8)                            | 208 (14.2)                         | 0.02    |
| Black                                                | 603 (81.9)                             | 133 (18.1)                         |         |
| Men                                                  | 942 (84.1)                             | 178 (15.9)                         | 0.58    |
| Women                                                | 920 (84.9)                             | 163 (15.1)                         |         |
| Region of residence                                  |                                        |                                    | 0.69    |
| West                                                 | 119 (86.9)                             | 18 (13.1)                          |         |
| Midwest                                              | 303 (83.5)                             | 60 (16.5)                          |         |
| Northeast                                            | 96 (82.1)                              | 21 (17.9)                          |         |
| South                                                | 1344 (84.7)                            | 242 (15.3)                         |         |
| Not current smoker                                   | 1660 (84.0)                            | 316 (16.0)                         | 0.04    |
| Current smoker                                       | 199 (89.2)                             | 24 (10.8)                          |         |
| No abdominal obesity                                 | 941 (87.5)                             | 135 (12.5)                         | <0.01   |
| Abdominal obesity                                    | 910 (81.5)                             | 206 (18.5)                         |         |
| No hypertension                                      | 408 (87.4)                             | 58 (12.4)                          | 0.05    |
| Hypertension                                         | 1449 (83.8)                            | 280 (16.2)                         |         |

|                                                         |             |            |       |
|---------------------------------------------------------|-------------|------------|-------|
| No diabetes                                             | 1313 (87.8) | 182 (12.2) | <0.01 |
| Diabetes                                                | 540 (77.4)  | 158 (22.6) |       |
| No history of CHD                                       | 1245 (87.1) | 185 (12.9) | <0.01 |
| History of CHD                                          | 578 (79.4)  | 149 (20.5) |       |
| No anemia                                               | 827 (87.4)  | 118 (12.5) | <0.01 |
| Anemia                                                  | 259 (70.4)  | 109 (29.6) |       |
| No family history of ESRD                               | 999 (83.5)  | 196 (16.4) | 0.38  |
| Family history of ESRD                                  | 131 (80.9)  | 31 (19.1)  |       |
| eGFR $\geq$ 60 ml/min/1.73m <sup>2</sup>                | 754 (93.4)  | 53 (6.6)   | <0.01 |
| eGFR < 60 ml/min/1.73m <sup>2</sup>                     | 1108 (79.3) | 288 (20.6) |       |
| ACR $\leq$ 30mg/g                                       | 806 (86.4)  | 127 (13.6) | 0.04  |
| ACR > 30mg/g                                            | 1056 (83.1) | 214 (16.9) |       |
| <b>Medicare variables<br/>(during look back period)</b> |             |            |       |
| Outpatient visits                                       |             |            |       |
| < 10                                                    | 505 (96.6)  | 18 (3.4)   | <0.01 |
| 10 – 19                                                 | 633 (88.9)  | 79 (11.1)  |       |
| $\geq$ 20                                               | 724 (74.8)  | 244 (25.2) |       |
| No hospitalization                                      | 1205 (90.9) | 121 (9.1)  | <0.01 |
| Hospitalization                                         | 657 (74.8)  | 220 (25.1) |       |
| No nephrology visit                                     | 1794 (89.8) | 203 (10.2) | <0.01 |
| Nephrology visit                                        | 68 (32.9)   | 138 (67.0) |       |
| Not Medicaid eligible                                   | 1689 (85.3) | 291 (14.7) | <0.01 |
| Medicaid eligible                                       | 173 (77.6)  | 50 (22.4)  |       |

SD – standard deviation, CKD – chronic kidney disease, eGFR – estimated glomerular filtration rate, ACR – albumin-to-creatinine ratio, CHD – coronary heart disease.

CKD<sub>Medicare</sub> was defined using the claims-based algorithm outlined in Item S1.

CKD<sub>REGARDS</sub> defined as estimated glomerular filtration rate < 60 ml/min/1.73 m<sup>2</sup> or albumin-to-creatinine ratio > 30 mg/g.

Model 1 includes adjustment for age, race, gender.

Model 2 includes adjustment for age, race, gender, outpatient visits, nephrologist visits, hospitalization during baseline and Medicaid eligible.
