# Supplementary material
Source: PubMed Central journal article supplement (PMC4721899)
Supplement: NIHMS629831-supplement-7.pdf [file NIHMS629831-supplement-7.pdf]

**Table S4.** Rates and hazard ratios for mortality and end-stage renal disease associated with Medicare claims for chronic kidney disease (CKD<sub>Medicare</sub>) among participants with chronic kidney disease (estimated glomerular filtration rate < 45 ml/min/1.73 m<sup>2</sup> or albumin-to-creatinine ratio > 300 mg/g) at the REGARDS study visit (CKD<sub>REGARDS</sub>).

|                          | Mortality                             |                                    | End-stage renal disease               |                                    |
|--------------------------|---------------------------------------|------------------------------------|---------------------------------------|------------------------------------|
|                          | No CKD <sub>Medicare</sub><br>(n=405) | CKD <sub>Medicare</sub><br>(n=198) | No CKD <sub>Medicare</sub><br>(n=405) | CKD <sub>Medicare</sub><br>(n=198) |
| Number of cases (%)      | 182 (45.6)                            | 92 (46.5)                          | 36 (8.9)                              | 37 (18.7)                          |
| Incidence rate (95% CI)* | 92.6 (79.2-106)                       | 100.1 (79.7-121)                   | 17.4 (11.7-23.0)                      | 41.1 (27.8-54.3)                   |
| Hazard ratios (95% CI)   |                                       |                                    |                                       |                                    |
| Model 1                  | 1 (ref)                               | 1.12 (0.87-1.45)                   | 1 (ref)                               | 2.10 (1.32 -3.35)                  |
| Model 2                  | 1 (ref)                               | 0.87 (0.64-1.20)                   | 1 (ref)                               | 1.11 (0.60 -2.06)                  |
| Model 3                  | 1 (ref)                               | 0.86 (0.63 -1.18)                  | 1 (ref)                               | 1.01 (0.53 -1.92)                  |

CKD – chronic kidney disease, CI – confidence interval.

CKD<sub>Medicare</sub> was defined using the claims-based algorithm outlined in Item S1.

Model 1 is adjusted for age, race, and gender.

Model 2 is adjusted for age, race, gender and Medicare variables during the look back period (outpatient visits, nephrologist visits, hospitalization during baseline and Medicaid eligible).

Model 3 is adjusted for variables in Model 2 and smoking, abdominal obesity, hypertension, diabetes, and history of CHD from the REGARDS study.

\*Incidence rate per 1,000 person-years (95% CI).
